# Supplementary material
Source: Springer Nature journal article supplement (https://www.springermedizin.de/resource/supplementary/13033_2014_223_MOESM2_ESM.pdf/9652046)

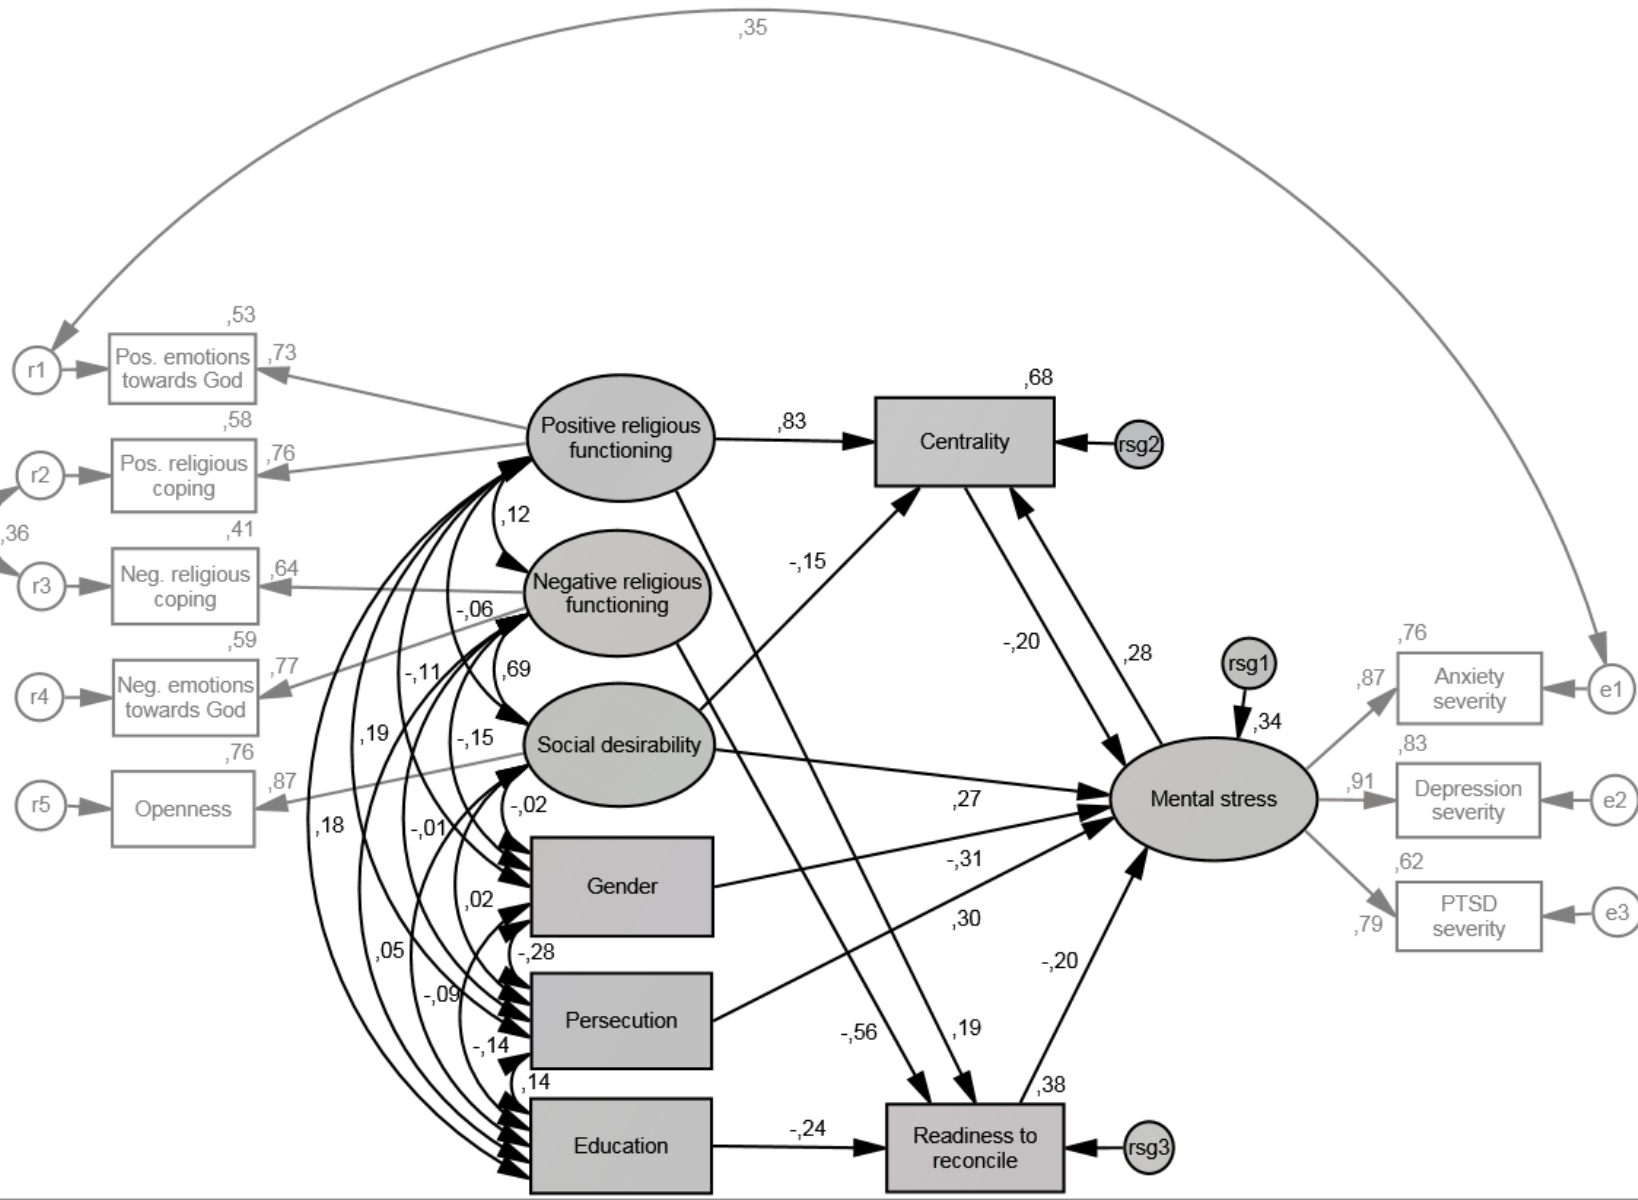

Supplement: MOESM2 [file 9652046]
